# Supplementary material for: IL-10-produced by human transitional B-cells down-regulates CD86 expression on B-cells leading to inhibition of CD4+T-cell responses
Source: PubMed Central journal article supplement (PMC4726240; doi:10.1038/srep20044), 2016-01-22
Supplement: srep20044-s1.pdf [file srep20044-s1.pdf]

# **IL-10-produced by human transitional B-cells down-regulates CD86 expression on B-cells leading to inhibition of CD4<sup>+</sup>T-cell responses**

**Short title for the running head:** Transitional B-cells down-regulate CD86 expression

**Author(s):** Nova-Lamperti Estefania<sup>1</sup>, Fanelli Giorgia<sup>1</sup>, Becker Pablo D.<sup>1</sup>, Chana Prabhjoat<sup>2</sup>, Elgueta Raul<sup>1</sup>, Dodd Philippa C.<sup>1</sup>, Lord Graham M.<sup>1,3</sup>, Lombardi Giovanna<sup>1§</sup>, Hernandez-Fuentes Maria P.<sup>1, 3§\*</sup>

## **Affiliation(s):**

<sup>1</sup>*King's College London, MRC Centre for Transplantation, London, United Kingdom.*

<sup>2</sup>*BRC Flow Cytometry Laboratory, Guy's Hospital, London, United Kingdom.*

<sup>3</sup>*NIHR Comprehensive Biomedical Research Centre at Guy's and St Thomas' Hospital.*

§ These authors contributed equally to this work

\***Correspondence** to Dr Maria P. Hernandez-Fuentes, MRC Centre for Transplantation, 5th Floor Tower Wing, Guy's Hospital, Great Maze Pond, London SE1 9RT, UK. Tel: +44 207 188 5435; fax: +44 207 1885903

e-mail: [maria.hernandez@kcl.ac.uk](mailto:maria.hernandez@kcl.ac.uk)

## Supplementary Methodology

### Cell sorting

B-cells were stained with anti-CD20-Pacific-Blue (eBioscience, Hatfield, UK), anti-CD27-APC (eBioscience, Hatfield, UK), anti-CD24-PerCP-Cy5.5 (BD Biosciences, Oxford, UK), anti-CD38-PECy7 (eBioscience, Hatfield, UK) and Live/Dead fixable yellow dead cell staining kit (Life Technologies Ltd, Paisley, UK) for 30min 4°C. T-cells were stained with anti-CD4-Qdot605 (eBioscience, Hatfield, UK), anti-CD25-PE (eBioscience, Hatfield, UK), anti-CD45RA-AlexaFluor700 (BD Biosciences, Oxford, UK) and anti-CD45RO-PECy7 (eBioscience, Hatfield, UK) for 30min 4°C. B-cell and T-cell subsets were sorted with a BD FACSAriaII (BD). Memory B-cells were  $CD20^+CD27^+$ , naïve B-cells were  $CD20^+CD27^-CD24^+CD38^+$  and transitional B-cells were  $CD20^+CD27^-CD24^{hi}CD38^{hi}$  (all purity>99%) (Fig.S1). Memory T-cells were  $CD4^+CD25^{low+int}CD45RA^-CD45RO^+$  and naïve T-cells were  $CD4^+CD25^{low+int}CD45RA^+CD45RO^-$  (all purity>99%) (Fig.S3).

## Supplementary Figures

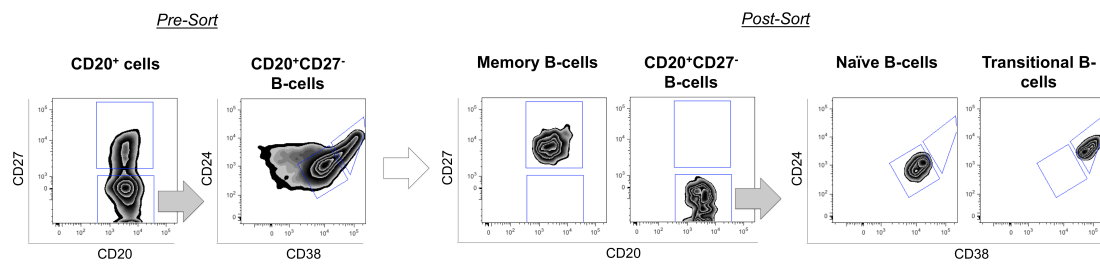

**Supplementary Figure 1: Sorting strategy of B-cell subsets.** Memory B-cells were identified as CD20<sup>+</sup>CD27<sup>+</sup> cells, naïve B-cells were identified as CD20<sup>+</sup>CD27<sup>-</sup>CD24<sup>+</sup>CD38<sup>+</sup> and transitional B-cells were identified as CD20<sup>+</sup>CD27<sup>-</sup>CD24<sup>hi</sup>CD38<sup>hi</sup>.

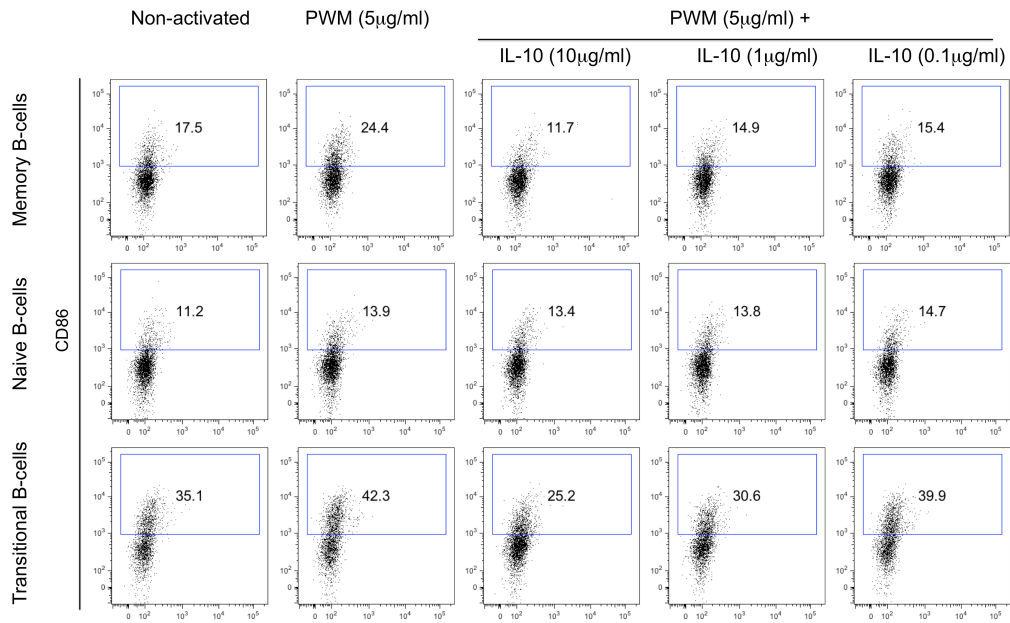

**Supplementary Figure 2: Effect of exogenous IL-10 in the expression of CD86 in Pokeweed-mitogen-activated B-cell subsets.** Expression of CD86 by surface staining in cell-sorted memory, naïve and transitional B-cells ( $1 \times 10^5$ /well) activated with Pokeweed-mitogen ( $5 \mu\text{g/ml}$ ) for 72h in the presence of three concentration of exogenous IL-10 ( $10 \mu\text{g/ml}$ ,  $1 \mu\text{g/ml}$ ,  $0.1 \mu\text{g/ml}$ ).

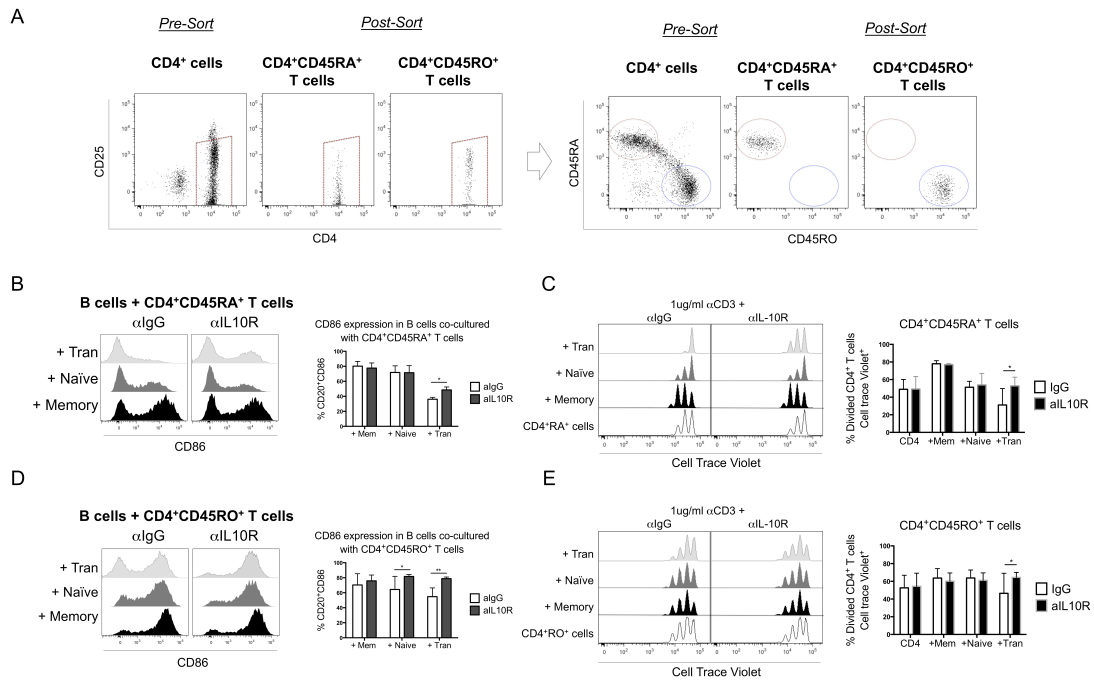

**Supplementary Figure 3: Sorting strategy of T-cell subsets and effect of IL-10 production by transitional B-cells on naïve and memory T-cell proliferation.** (A) Sorting strategy of T-cell subsets.  $CD4^+CD25^{hi}$  cells were excluded from the subset selection. Naïve T-cells were identified as  $CD4^+CD25^{low+int}CD45RA^+CD45RO^-$  cells and memory T-cells were identified as  $CD4^+CD25^{low+int}CD45RA^-CD45RO^+$  cells. (B) CD86 expression on B-cells and (C) T-cell proliferation of  $1 \times 10^5$  anti-CD3 activated sorted naïve T-cells co-cultured with  $1 \times 10^5$  B-cell subsets was measured in the presence of a neutralizing anti-IL-10R antibody ( $0.1 \mu\text{g/ml}$ ) or isotype control after 72h of culture. (D) CD86 expression on B-cells and (E) T-cell proliferation of  $1 \times 10^5$  anti-CD3 activated sorted memory T-cells co-cultured with  $1 \times 10^5$  B-cell subsets was measured in the presence of a neutralizing anti-IL-10R antibody ( $0.1 \mu\text{g/ml}$ ) or isotype control after 72h of culture. Bars in graphs represent the mean and standard error of 4 different experiments  $**P < 0.01$  and  $*P < 0.05$  by Two-way ANOVA test with Sidak's multiple comparison test.

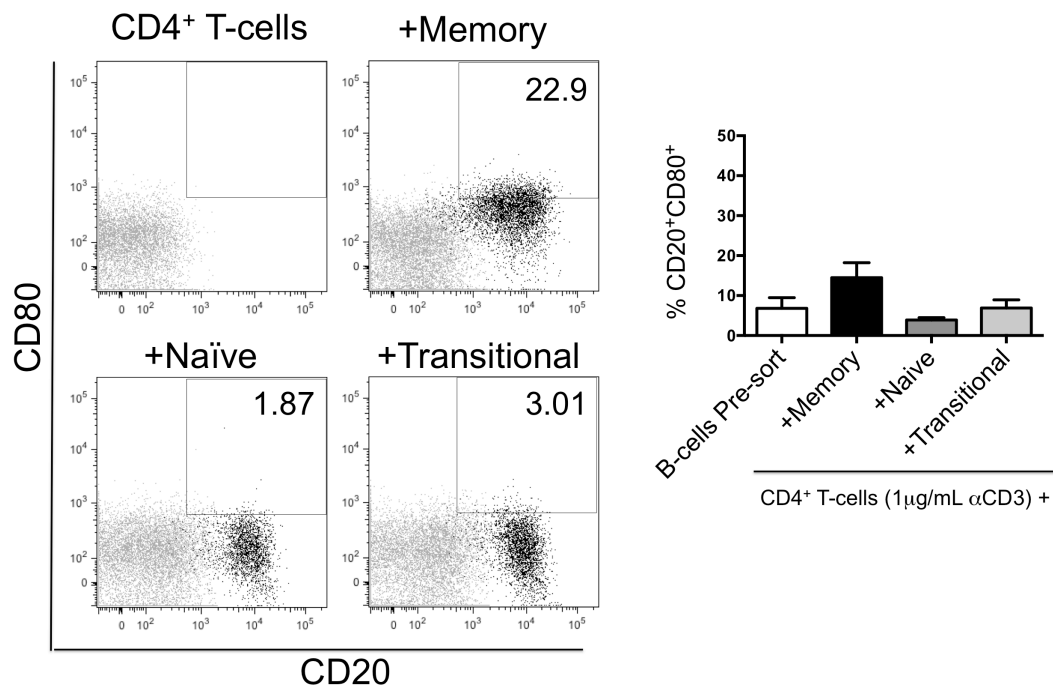

**Supplementary Figure 4: CD80 expression in B-cell subsets.** Representative dot plots and total expression of CD80 by B-cells (black dots) was measured co-cultures between anti-CD3-activated CD4<sup>+</sup>T-cells with memory, naïve or transitional B-cells. Bars in graphs represent the mean and standard error of mean of 4 different experiments. Kruskal-Wallis followed by Dunn's multiple comparison tests were used.

## Tolerant recipients

| Patient data                | Tol 1     | Tol 2     | Tol 3  | Tol 4     | Tol 5  | Tol 6    | Tol 7     | Tol 8     | Tol 9  | Tol10        |
|-----------------------------|-----------|-----------|--------|-----------|--------|----------|-----------|-----------|--------|--------------|
| Age in years                | 77        | 33        | 52     | 63        | 62     | 41       | 35        | 22        | 63     | 51           |
| Sex                         | Male      | Male      | Male   | Female    | Male   | Female   | Female    | Male      | Male   | Male         |
| Ethnicity                   | NS        | White     | White  | White     | White  | NS       | White     | White     | White  | White        |
| Donor type                  | Deceased  | Deceased  | Living | Living    | Living | Deceased | Deceased  | Living    | Living | Deceased     |
| <b>Total HLA mismatches</b> | 1A+1B+1DR | 1A+2B+1DR | No MM  | 1A+1B+1DR | No MM  | 1A+2B    | 1A+1B+1DR | 1A+1B+1DR | 1A     | Missing data |

### Renal Function Parameters

|                                   |        |       |       |       |       |    |       |       |        |       |
|-----------------------------------|--------|-------|-------|-------|-------|----|-------|-------|--------|-------|
| Creatinine (mmols/L)              | 127.29 | 239   | 86    | 124   | 96    | 72 | 116   | 110   | 67     | 117   |
| eGFR (mL/min/1.73m <sup>2</sup> ) | 50.56  | 29.03 | 86.09 | 40.28 | 73.17 | 77 | 49.01 | 77.17 | 110.45 | 60.59 |

### Immunosuppressive Regime (mg/day)

|              |     |     |     |     |     |     |     |     |     |     |
|--------------|-----|-----|-----|-----|-----|-----|-----|-----|-----|-----|
| Cyclosporine | 0.0 | 0.0 | 0.0 | 0.0 | 0.0 | 0.0 | 0.0 | 0.0 | 0.0 | 0.0 |
| Tacrolimus   | 0.0 | 0.0 | 0.0 | 0.0 | 0.0 | 0.0 | 0.0 | 0.0 | 0.0 | 0.0 |
| Azathioprine | 0.0 | 0.0 | 0.0 | 0.0 | 0.0 | 0.0 | 0.0 | 0.0 | 0.0 | 0.0 |
| Prednisone   | 0.0 | 0.0 | 0.0 | 0.0 | 0.0 | 0.0 | 0.0 | 0.0 | 0.0 | 0.0 |
| MMF          | 0.0 | 0.0 | 0.0 | 0.0 | 0.0 | 0.0 | 0.0 | 0.0 | 0.0 | 0.0 |

## Recipients with Chronic Rejection

| Patient data                | CR 1     | CR 2   | CR 3     | CR 4      | CR 5      | CR 6      | CR 7     | CR 8     | CR 9      | CR10   |
|-----------------------------|----------|--------|----------|-----------|-----------|-----------|----------|----------|-----------|--------|
| Age in years                | 29       | 40     | 43       | 53        | 44        | 72        | 32       | 41       | 66        | 50     |
| Sex                         | Male     | Male   | Male     | Female    | Female    | Male      | Male     | Male     | Male      | Male   |
| Ethnicity                   | White    | White  | White    | White     | Asian     | White     | White    | White    | White     | White  |
| Donor type                  | Deceased | Living | Deceased | Living    | Living    | Deceased  | Deceased | Deceased | Living    | Living |
| <b>Total HLA mismatches</b> | 1A+1B    | 1B+1DR | 2A+2B    | 1A+2B+1DR | 2A+2B+1DR | 1A+1B+1DR | 2A+1B    | 2A+2B    | 2A+1B+1DR | 1A+1DR |

### Renal Function Parameters

|                                   |       |       |       |       |       |       |       |       |       |       |
|-----------------------------------|-------|-------|-------|-------|-------|-------|-------|-------|-------|-------|
| Creatinine (mmols/L)              | 215   | 220   | 196   | 278   | 224   | 514   | 185   | 215   | 258   | 217   |
| eGFR (mL/min/1.73m <sup>2</sup> ) | 33.67 | 30.71 | 34.58 | 16.43 | 21.79 | 10.24 | 39.25 | 31.38 | 23.09 | 29.82 |

### Immunosuppressive Regime (mg/day)

|              |        |       |        |       |      |      |       |        |        |        |
|--------------|--------|-------|--------|-------|------|------|-------|--------|--------|--------|
| Cyclosporine | 0.0    | 0.0   | 0.0    | 0.0   | 0.0  | 0.0  | 0.0   | 0.0    | 150.0  | 0.0    |
| Tacrolimus   | 4.0    | 5.6   | 4.0    | 3.0   | 2.5  | 4.0  | 10.0  | 6.0    | 0.0    | 11.0   |
| Azathioprine | 0.0    | 0.0   | 0.0    | 150.0 | 0.0  | 75.0 | 150.0 | 0.0    | 0.0    | 0.0    |
| Prednisone   | 10.0   | 5.0   | 5.0    | 0.0   | 10.0 | 5.0  | 10.0  | 10.0   | 0.0    | 5.0    |
| MMF          | 1000.0 | 777.6 | 1000.0 | 0.0   | 0.0  | 0.0  | 0.0   | 1440.0 | 1000.0 | 1036.8 |

**Supplementary Table 1: Clinical data of kidney transplant recipients.**

Tol: Tolerant recipient. CR: Recipient with Chronic Rejection. MMF: mycophenolate mofetil. eGFR: estimated glomerular filtration rate. NS: Not Stated. MM: mismatch.
